# Supplementary material
Source: PubMed Central journal article supplement (PMC5290819)
Supplement: EMBR-17-249-s001.pdf [file EMBR-17-249-s001.pdf]

## Expanded View Figures

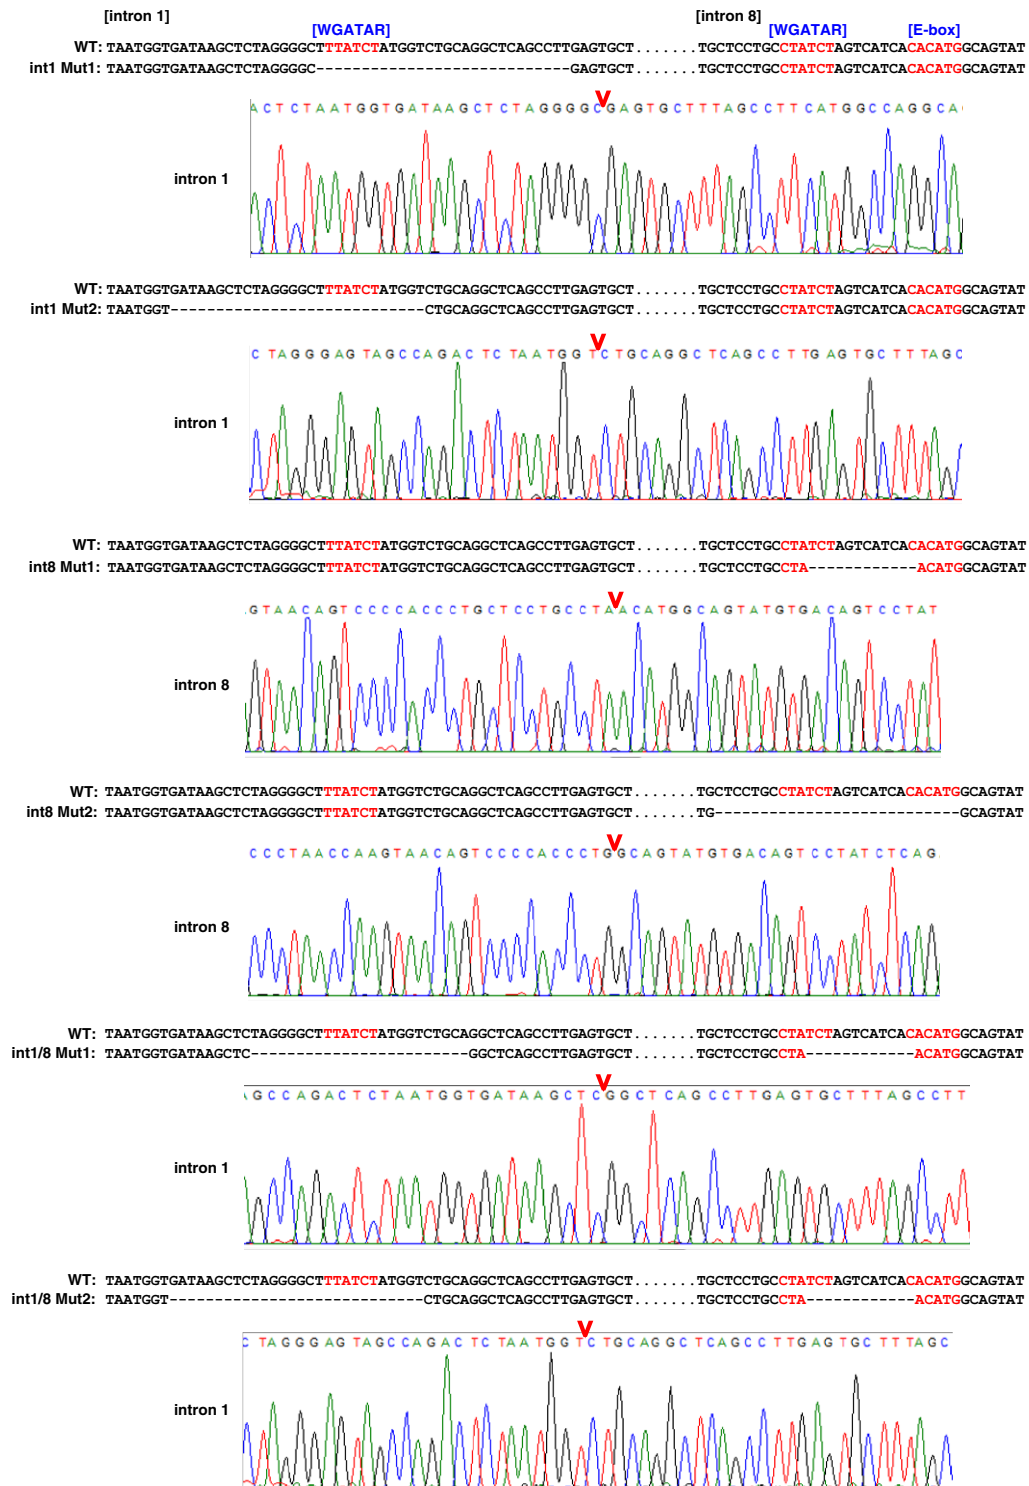

Figure EV1. DNA sequences at *Alas2* intron 1 or 8 of mutant clonal cell lines.

CRISPR/Cas9-mediated mutations were detected by direct sequencing of the PCR amplicons of genomic DNA.

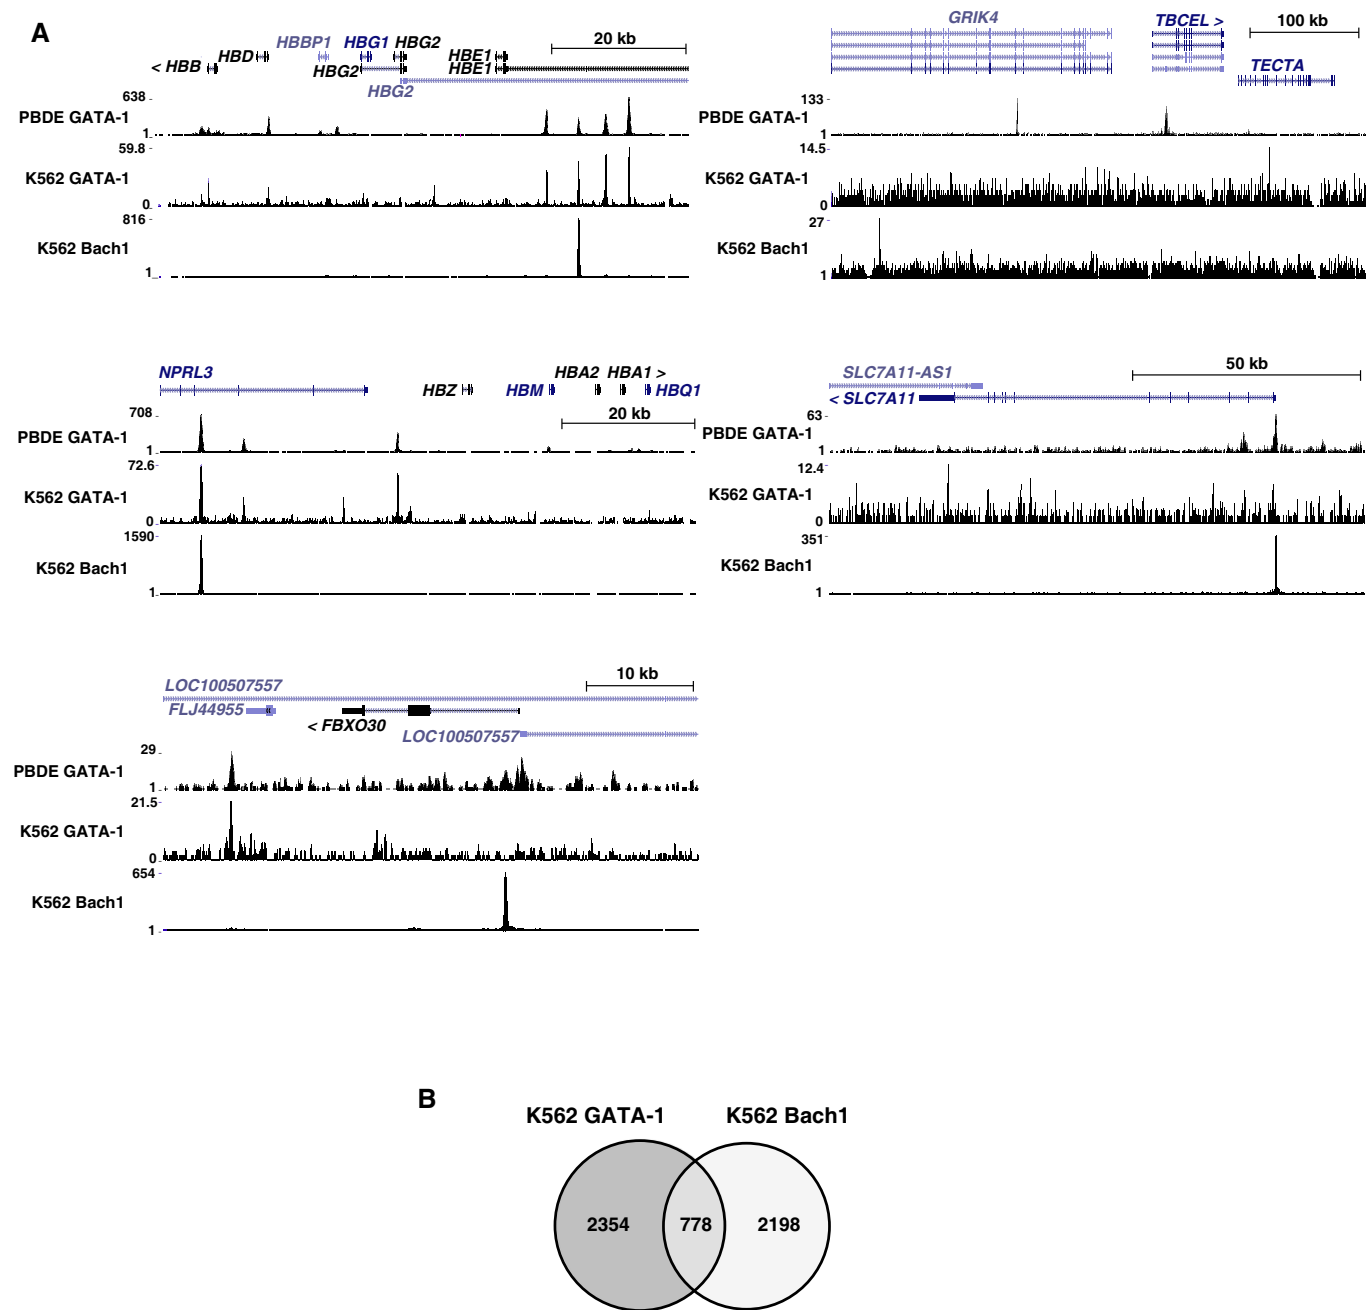

**Figure EV2. GATA-1 and Bach1 ChIP-seq profiles.**

A ChIP-seq data revealed GATA-1 and Bach1 occupancy at Bach1-sensitive genes in primary human erythroid cells (peripheral blood-derived erythroblasts) and K562 erythroleukemia cells (accession numbers: GSM935540, GSM935465, and GSM935576).

B Venn diagram depicting relationships between GATA-1 and Bach1 target genes in K562 cells. The definition of a “target” gene was as follows: the gene had a peak in one of the promoter regions (2 kb upstream of transcription start site (TSS) to 200 bp downstream of TSS), a peak in one of the introns, or a peak in the region 10 kb upstream of TSS, which was not in an intron or promoter of another gene. All target genes were listed in Table EV3.

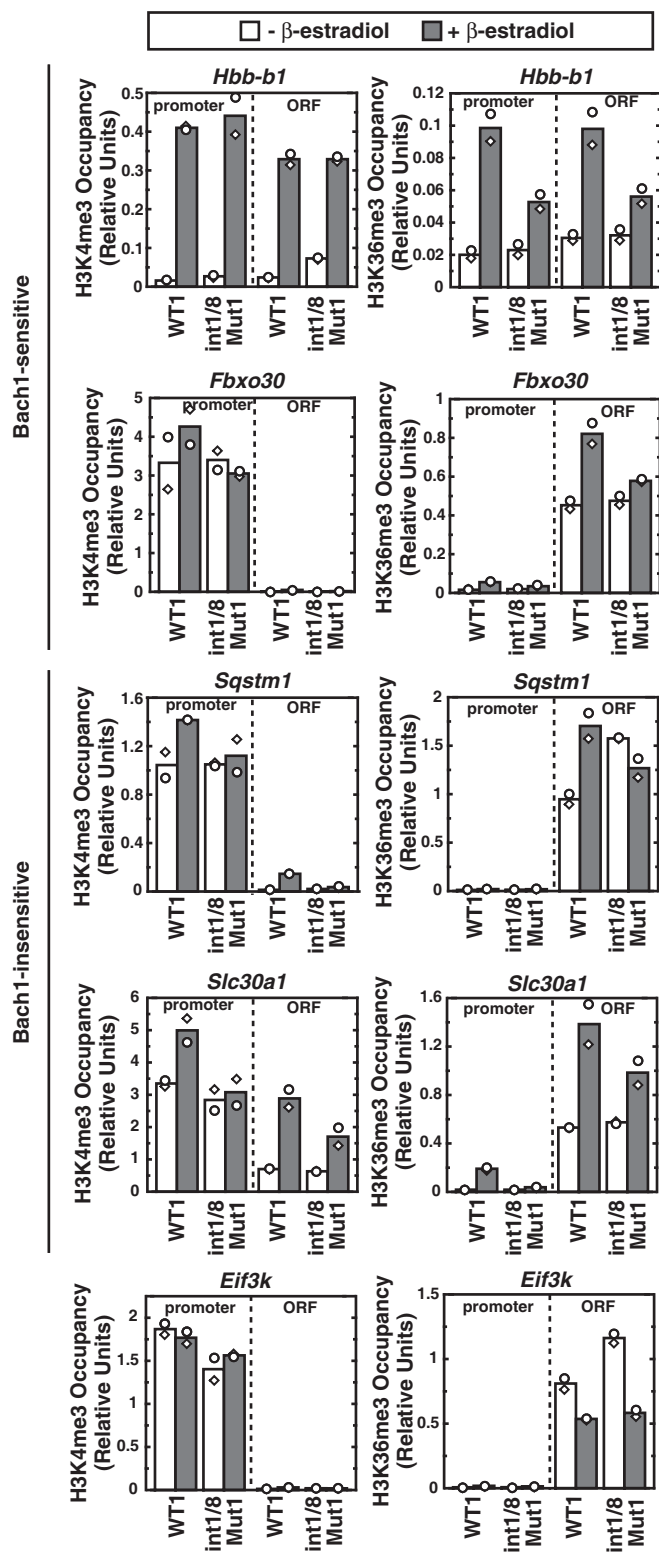

**Figure EV3. Quantitative ChIP analysis of H3K4me3 and H3K36me3 levels at promoters and open reading frames of Bach1-sensitive and Bach1-insensitive genes.**

Quantitative ChIP analysis revealed H3K4me3 and H3K36me3 levels in untreated or β-estradiol-treated WT1 and double-mutant clone 1 ( $n = 2$ ; bars show the mean and individual data points are shown; each data point was based on two measurements).
